# Supplementary material
Source: PubMed Central journal article supplement (PMC10880598)
Supplement: aem.02111-23-s0001.pdf [file aem.02111-23-s0001.pdf]

**SUPPLEMENTAL MATERIAL** Baugh et al., 2023  
 Regulation of tricarboxylate transport and metabolism in *Acinetobacter baylyi* ADP1

**TABLE S1** Sequence similarity between homologous proteins involved in Tcb metabolism<sup>a</sup>

|                                                               |                        | <i>Acinetobacter baylyi</i> ADP1 <sup>b</sup> |                              |                              |                              |                              |
|---------------------------------------------------------------|------------------------|-----------------------------------------------|------------------------------|------------------------------|------------------------------|------------------------------|
|                                                               |                        | TcuR<br><b>ACIAD_RS07100</b>                  | TclR<br><b>ACIAD_RS07105</b> | TcuA<br><b>ACIAD_RS07085</b> | TcuB<br><b>ACIAD_RS07080</b> | TcuC<br><b>ACIAD_RS07100</b> |
| <i>Salmonella enterica</i><br>Typhimurium<br>LT2 <sup>b</sup> | TcuR<br><b>STM0692</b> | 44 (67) %                                     | 42 (65) %                    |                              |                              |                              |
|                                                               | TcuA<br><b>STM0691</b> |                                               |                              | 75 (85) %                    |                              |                              |
|                                                               | TcuB<br><b>STM0690</b> |                                               |                              |                              | 58 (73) %                    |                              |
|                                                               | TcuC<br><b>STM0689</b> |                                               |                              |                              |                              | 60 (74) %                    |

<sup>a</sup>Values in boxes indicate the percentage of identical and (similar) amino acids in a pairwise alignment of the protein sequences indicated. Similarity was evaluated using the default parameters for the Ident and Sim program (1).

<sup>b</sup>Locus tags, in bold, correspond to genes in reference genomes: NC\_005966 (ADP1) and NC\_003197 (LT2).

**SUPPLEMENTAL MATERIAL** Baugh et al., 2023  
Regulation of tricarboxylate transport and metabolism in *Acinetobacter baylyi* ADP1

**TABLE S2** *Acinetobacter baylyi* strains derived from ADP1

| Strain            | Relevant Characteristics <sup>a, b</sup>                                                                                                                                                                                                                | Source     |
|-------------------|---------------------------------------------------------------------------------------------------------------------------------------------------------------------------------------------------------------------------------------------------------|------------|
| ADP1 <sup>c</sup> | Wild-type strain (BD413)                                                                                                                                                                                                                                | (2, 3)     |
| ACN1373           | $\Delta$ <i>tcuR</i> :: <i>sacB</i> - $\Omega$ K51373<br><i>sacB</i> - $\Omega$ K from pRMJ1 replaces <i>tcuR</i> (1,540,519-1,541,442) <sup>d</sup><br>pBAC1122/AatII x ADP1                                                                           | This study |
| ACN1376           | $\Delta$ <i>tcuR</i> 51376<br>Deletion of <i>tcuR</i> (1,540,519-1,541,442) <sup>d</sup><br>pBAC1120/AatII x ACN1373                                                                                                                                    | This study |
| ACN1385           | $\Delta$ <i>pacI</i> :: <i>sacB</i> - $\Omega$ K51385<br><i>sacB</i> - $\Omega$ K from pRMJ1 replaces <i>pacI</i> (1,541,580-1,542,368) <sup>d</sup><br>pBAC1142/AatII & XmnI x ADP1                                                                    | This study |
| ACN1388           | $\Delta$ <i>pacI</i> 51388<br>Deletion of <i>pacI</i> (1,541,580-1,542,368) <sup>d</sup><br>pBAC1137/AatII & XmnI x ACN1385                                                                                                                             | This study |
| ACN1419           | $\Delta$ <i>tcuC</i> :: <i>sacB</i> - $\Omega$ K51419<br><i>sacB</i> - $\Omega$ K from pRMJ1 replaces <i>tcuC</i> (1,542,464-1,543,768) <sup>d</sup><br>PCR product (pBAC1141 template with primers oST63 & M13R) x ADP1                                | This study |
| ACN1445           | $\Delta$ <i>tcuR</i> 51376, <i>tclR</i> 51445<br><i>tcuR</i> as in ACN1376, <i>tclR</i> mutations (C→T 1,544,371 and A→G 1,544,323) <sup>d</sup><br>ACN1376-derived Tcb <sup>+</sup> spontaneous mutant, TcIR(R200Q, L216P)                             | This study |
| ACN1456           | $\Delta$ <i>tcuC</i> 51456<br>Deletion of <i>tcuC</i> (1,542,464-1,543,768) <sup>d</sup><br>pBAC1138/BspHI & SphI x ACN1419                                                                                                                             | This study |
| ACN1556           | $\Delta$ <i>tcuR</i> 51376, <i>tclR</i> 51556<br><i>tcuR</i> as in ACN1376, <i>tclR</i> (C→T 1,544,371) <sup>d</sup><br>ACN1376-derived Tcb <sup>+</sup> spontaneous mutant, TcIR(R200Q)                                                                | This study |
| ACN3122           | $\Delta$ <i>tcuR</i> 51376, $\Delta$ <i>tcuA</i> :: <i>gfp<sub>sf</sub></i> - $\Omega$ K53122<br><i>tcuR</i> as in ACN1376, <i>gfp<sub>sf</sub></i> - $\Omega$ K replaces <i>tcuA</i> (1,539,009-1,540,412) <sup>d, e</sup><br>pBAC2102/BamHI x ACN1376 | This study |
| ACN3123           | $\Delta$ <i>tcuA</i> :: <i>gfp<sub>sf</sub></i> - $\Omega$ K53122<br><i>tcuA</i> fusion as in ACN3122<br>pBAC2109/BsaI x ADP1                                                                                                                           | This study |
| ACN3124           | $\Delta$ <i>tcuR</i> 51376, $\Delta$ <i>tclR</i> :: <i>sacB</i> - $\Omega$ K53124<br><i>sacB</i> - $\Omega$ K replaces <i>tclR</i> (1,544,043-1,544,936) <sup>d</sup><br>pBAC2101/BsaI & SacI x ACN1376                                                 | This study |
| ACN3125           | $\Delta$ <i>cltA</i> :: <i>sacB</i> - $\Omega$ S53125<br><i>sacB</i> - $\Omega$ S replaces <i>cltA</i> (388,259-389,574) <sup>d</sup><br>pBAC2110/AhdI & AatII x ADP1                                                                                   | This study |
| ACN3168           | $\Delta$ <i>tcuC</i> 51456, $\Delta$ <i>cltA</i> :: <i>sacB</i> - $\Omega$ S53125<br><i>tcuC</i> as in ACN1456, <i>sacB</i> - $\Omega$ S replaces <i>cltA</i> as in ACN3125<br>pBAC2110/AhdI & AatII x ACN1456                                          | This study |

**SUPPLEMENTAL MATERIAL** Baugh et al., 2023  
Regulation of tricarboxylate transport and metabolism in *Acinetobacter baylyi* ADP1

|         |                                                                                                                                                                                                                                                                                                   |            |
|---------|---------------------------------------------------------------------------------------------------------------------------------------------------------------------------------------------------------------------------------------------------------------------------------------------------|------------|
| ACN3171 | <i>ΔtcuR51376, ΔtclR53171</i><br><i>ΔtcuR</i> as in ACN1376, deletion of <i>tclR</i> (1,544,043-1,544,936) <sup>d</sup><br>pBAC2093/BsaI x ACN3124                                                                                                                                                | This study |
| ACN3172 | <i>ΔtclR::sacB-ΩK53124</i><br><i>sacB-ΩK</i> replaces <i>tclR</i> as in ACN3124<br>pBAC2101/BsaI & SacI x ADP1                                                                                                                                                                                    | This study |
| ACN3173 | <i>ΔtcuR51376, ΔtclR53171, ΔtcuA::gfp<sub>sf</sub>-ΩK53122</i><br><i>ΔtcuR</i> as in ACN1376, <i>ΔtclR</i> as in ACN3171, <i>tcuA</i> fusion as in ACN3122<br>pBAC2102/BamHI x ACN3171                                                                                                            | This study |
| ACN3178 | <i>ΔtclR53171</i><br><i>ΔtclR</i> as in ACN3171<br>pBAC2093/BsaI x ACN3172                                                                                                                                                                                                                        | This study |
| ACN3179 | <i>ΔtcuR51376, tclR51445</i><br><i>ΔtcuR</i> as in ACN1376, <i>tclR</i> mutations as in ACN1445 [TclR(R200Q, L216P)]<br>pBAC1164/BsaI x ACN3124                                                                                                                                                   | This study |
| ACN3184 | <i>ΔtclR53171, ΔtcuA::gfp<sub>sf</sub>-ΩK53122</i><br><i>ΔtclR</i> as in ACN3171, <i>tcuA</i> fusion as in ACN3122<br>pBAC2109/AatII & SbfI x ACN3178                                                                                                                                             | This study |
| ACN3187 | <i>ΔtcuR51376, tclR51556</i><br><i>ΔtcuR</i> as in ACN1376, <i>tclR</i> mutation as in ACN1556 [TclR(R200Q)]<br>pBAC1863/AatII x ACN3124                                                                                                                                                          | This study |
| ACN3190 | <i>ΔtcuR51376, tclR51445, ΔtcuA::gfp<sub>sf</sub>-ΩK53122</i><br><i>ΔtcuR</i> as in ACN1376, <i>tclR</i> as in ACN1445 [TclR(R200Q, L216P)], <i>tcuA</i> fusion as in ACN3122<br>pBAC2102/BamHI x ACN3179                                                                                         | This study |
| ACN3191 | <i>ΔtcuR51376, tclR51556, ΔtcuA::gfp<sub>sf</sub>-ΩK53122</i><br><i>ΔtcuR</i> as in ACN1376, <i>tclR</i> as in ACN1556 [TclR(R200Q)], <i>tcuA</i> fusion as in ACN3122<br>pBAC2102/BamHI x ACN3187                                                                                                | This study |
| ACN3222 | <i>ΔtcuR51376, tcuC-gfp<sub>sf</sub>-ΩK53222, ΔpacI53222</i><br><i>ΔtcuR</i> as in ACN1376, Region downstream of <i>tcuC</i> including <i>pacI</i> deleted (1,541,578 – 1,542,444) <sup>d</sup> and replaced with a <i>gfp<sub>sf</sub>-ΩK</i> DNA <sup>e</sup><br>pBAC2161/BsaI & NdeI x ACN1376 | This study |
| ACN3223 | <i>ΔtcuR51376, ΔtclR53171, tcuC-gfp<sub>sf</sub>-ΩK53222, ΔpacI53222</i><br><i>ΔtcuR</i> as in ACN1376, <i>ΔtclR</i> as in ACN3171, <i>tcuC</i> fusion and <i>ΔpacI</i> as in ACN3222<br>pBAC2161/BsaI & NdeI x ACN3171                                                                           | This study |
| ACN3224 | <i>ΔtclR53171, tcuC-gfp<sub>sf</sub>-ΩK53222, ΔpacI53222</i><br><i>ΔtclR</i> as in ACN3171, <i>tcuC</i> fusion and <i>ΔpacI</i> as in ACN3222<br>pBAC2158/BsaI & NdeI x ACN3178                                                                                                                   | This study |
| ACN3225 | <i>tcuC-gfp<sub>sf</sub>-ΩK53222, ΔpacI53222</i><br><i>tcuC</i> fusion and <i>ΔpacI</i> as in ACN3222<br>pBAC2158/BsaI & NdeI x ADP1                                                                                                                                                              | This study |
| ACN3226 | <i>ΔcltA::sacB-ΩS53125, tcuC-gfp<sub>sf</sub>-ΩK53222, ΔpacI53222</i><br><i>sacB-ΩS</i> replaces <i>cltA</i> as in ACN3125, <i>tcuC</i> fusion and <i>ΔpacI</i> as in ACN3222<br>pBAC2158/BsaI & NdeI x ACN3125                                                                                   | This study |

**SUPPLEMENTAL MATERIAL** Baugh et al., 2023  
Regulation of tricarboxylate transport and metabolism in *Acinetobacter baylyi* ADP1

|         |                                                                                                                                                                                                                                            |            |
|---------|--------------------------------------------------------------------------------------------------------------------------------------------------------------------------------------------------------------------------------------------|------------|
| ACN3227 | <i>ΔtcuR51376, tclR51445, tcuC-gfp<sub>sf</sub>-ΩK53222, ΔpacI53222</i><br><i>ΔtcuR</i> as in ACN1376, <i>tclR</i> as in ACN1445 [TclR(R200Q, L216P)], <i>tcuC</i> fusion and <i>ΔpacI</i> as in ACN3222<br>pBAC2161/BsaI & NdeI x ACN3179 | This study |
| ACN3228 | <i>ΔtcuR51376, tclR51556, tcuC-gfp<sub>sf</sub>-ΩK53222, ΔpacI53222</i><br><i>ΔtcuR</i> as in ACN1376, <i>tclR</i> as in ACN1556 [TclR(R200Q)], <i>tcuC</i> fusion and <i>ΔpacI</i> as in ACN3222<br>pBAC2161/BsaI & NdeI x ACN3187        | This study |

<sup>a</sup>. For strains generated by allelic replacement, transformation is indicated by the donor DNA x recipient strain. Plasmids (Table S3) used as donor DNA were linearized by restriction digestion, indicated by plasmid name/restriction enzyme(s). When PCR products were used as donor DNA, they were first treated with DpnI to degrade the methylated template DNA. Plasmids and primers described further in Tables S3 and S4.

<sup>b</sup>. Abbreviations: coding sequence (CDS), Kanamycin (Km), omega cassette conferring Km<sup>R</sup> (ΩK), omega cassette conferring Sm<sup>R</sup>Sp<sup>R</sup> (ΩS).

<sup>c</sup>. *A. baylyi* strains were derived from ADP1, previously known as *Acinetobacter calcoaceticus* or *Acinetobacter sp.* (2, 3).

<sup>d</sup>. Bold numbers correspond to positions on the ADP1 chromosome in NCBI entry NC\_005966.

<sup>e</sup>. Sequence of the transcriptional reporter. To generate the *ΔtcuA::gfp<sub>sf</sub>-ΩK53122* transcriptional fusion, the following purple text sequence (starting with ATG) exactly replaced the *tcuA* coding sequence in the orientation that the coding sequence of GFP<sub>sf</sub> (highlighted in grey) replaced that of TcuA. To generate the *tcuC-gfp<sub>sf</sub>-ΩK53222* transcriptional fusion, the entire following sequence (black and purple text) replaced the chromosomal sequence such that the *tcuC* promoter drives transcription of *gfp<sub>sf</sub>*. The coding sequence for GFP is highlighted in grey. The RBS used in *tcuC-gfp<sub>sf</sub>-ΩK53222* is in bold. The gene encoding Km<sup>R</sup> (reverse complement) is underlined.

TccttcaggaggacagctATGGCTAGCAAAGGAGAAGAACTTTTCACGGGAGTGTCCCAATCTTGTGTAATTAGATGGTGTGTTAATGGGCACA  
AATTTTCTGTCCGTGGAGAGGGTGAAGGTGATGCTACAACCGGAAACTCACCTTAAATTTATTTGCACTACTGGAAAACACTACCTGTCCATGGCC  
AACACTTGTCACTACTCTGACCTATGGTGTTCATGCTTTTCCCGTTATCCGGATCACATGAAACGGCATGACTTTTCAAGAGTGCCATGCCCGAA  
GGTTATGTACAGGAACGCATATATCTTTCAAAGATGACGGGACCTACAAGACGCGTGTGAAGTCAAGTTGAAGGTGATACCCCTTGTAAATCGTA  
TCGAGTTAAAGGGTATTGATTTTAAAGAAGATGGAACATTCTGGACACAACTCGAGTACAACCTTAACTCACACAATGTATACATCACGGCAGA  
CAAAACAAAAGAAATGGAATCAAAGCTAATCTCAAATTCGCCACAACGTTGAAGATGGTTCGGTTCAACTAGCAGACCATATCAACAAAATACTCCA  
ATTGGCGATGGCCCTGTCTTTTACCAGACAACCATTACCTGTGACACAATCTGTCTTTTCGAAAGATCCCAACGAAAAGCGTGACCACATGGTCC  
TTCTTGAGTTTGAACCTGCTGCTGGGATTACACATGGCATGGATGAGCTTACAAAagggtggcggttctgaaattcacacctaggtaaagctcggtacg  
atccgggtgattgattgagcaagcttattgcttgttaaaccggttttgtgaaaaaatttttaaaataaaaaaggggacctctaggggtccccaaattaatta  
gtaataataatctataaagggtcattcaaaagggtcatccaccggatcaattcccctgctcgcgagggtgggtgccaagctctcgggtaacatcaagg  
cccgatccttgaggcccttgccctcccgcacgatgatcgctgcccgtgatcgaaatccagatccttgaccgcagttgcaaacctcactgatccgctcg  
accaaagcggccatcgctgctcccactcctgcaagttcggggcagatgacgagcagtagccgctggtttcctggatgctcctcctgatttggcatttgc  
gccggtagaactccgctgctgctccagcctcaggcagcagctgaaccaactcggcaggggagtcgagcccggggtggcggaagaactccagcatgag  
atccccgcgctggaggatcatccagccggcgtcccggaaaacgatccgaagcccaaccttcatagaaggcggcggtggaaatcgaaatctcgtgat  
ggcaggttggcgctgcttggctcggtcatttgaaccccagagtcctcctcagaagaactcgtcaagaaggcgatagaaggcgatgctgctgccaatc  
gggagcggcagataccgtaaaagcagaggaagcgggtcagccatcgcgcgcaagctcagcaataatcagcgggtagccaacgctatgctcctgatag  
cggctccgcacaccccagccggccacagctcgatgaatccagaaaagcggccattttccaccatgatattcggcaagcaggcatcgccatgggtcacga  
cgagatcctcgccgctgggcatgcccgccttgagcctggcgaacaggtcggctggcgcgagccctgatgctcctcgtccagatcatcctgatcgac  
aagaccgcttccatccgagtagctgctcgctcgatgctgatttccgcttgggtggatggaatgggcaggtagccggtcaagcgtatgacgcccgc  
atgcatcagccatgatggatactttctcggcaggagcaaggtgagatgacagagatcctgccccggcactcgcaccaatagcagccagctcccttc  
ccgctcagtgacaacgctcgagcagctgccaaggaacgcccgtcgctggccagccaagcagtagccgctgctcctcctgcaagcttccatcaggcc  
accggacaggtcggctctgcaaaaaagaacccggcgcctcgcctgacagccggaacacggcggcatcagagcagccgattgtcgttggccag  
tcatagccgaatagcctcaccaccaagcggccggagaaacctcgtgcaatccatcttgttcaatcatgcaaacgatcctcactcctgctccttgat  
cagatcttgatccctcgccatcagatccttggcggcaagaagccatccagtttactttgcagggttcccaacctaccagagggcgcccagc  
tggcaattcgggttctgcttctgctccataaaacccgcccagctcagctgtagctgagcagcagtagccgctgcaagcactgcaagctccttcttggctg  
tttcccttgcagatagcccagtagctgacattcatccggggtcagcaccgtttctgaggactggctttctacgtgttccgcttccctttagcagc  
ccttgcgcccgtgagcttgcgagcagctgaagctcgcgagatcagttggaagaatttgcactacgtgaaaggcgagatcacaaggttagctcg  
caataatgtctaaactcgttcaagccagcgcgctcgcggcggcgttaactcaagcgttagatgcaactaagcacaataatgctcagcaca  
actacaggtcaagctcgtctttatatttttaagcgtgataataaagccctacacaataatgggagatataatcagaaagcgtgcttttcttgg  
atcgcaatagttggcgaagtaatcgcaaacctccgcatataaactctagcaggggcttactaagctgatccgggtggatgacctttgaaatgacctta  
atagattatattactaatatttggggaccctagaggtcccctttttattttaaaaaatttttcacaaaacgggttacaagcataaagcttgcctca  
atcaatcaccggatctaccgggc

**SUPPLEMENTAL MATERIAL** Baugh et al., 2023  
Regulation of tricarboxylate transport and metabolism in *Acinetobacter baylyi* ADP1

**Table S3** Plasmids used in this study

| Plasmid  | Relevant Characteristics <sup>a</sup>                                                                                                                                                                                                                                                                                                                                                                                                                                                                                             | Source     |
|----------|-----------------------------------------------------------------------------------------------------------------------------------------------------------------------------------------------------------------------------------------------------------------------------------------------------------------------------------------------------------------------------------------------------------------------------------------------------------------------------------------------------------------------------------|------------|
| pBAC1120 | Ap <sup>R</sup> Km <sup>R</sup> ; $\Delta$ <i>tcuR51376</i> ; SOEing of two PCR products: one upstream of <i>tcuR</i> (using <u>oMTV153</u> & <u>oMTV154</u> ) <sup>b</sup> , the other downstream of <i>tcuR</i> (using <u>oMTV155</u> & <u>oMTV152</u> ). <sup>b</sup> XhoI site replaces <i>tcuR</i> CDS. DNA ligated into pUC18 (SacI and PstI digested).                                                                                                                                                                     | This study |
| pBAC1122 | Ap <sup>R</sup> Km <sup>R</sup> ; $\Delta$ <i>tcuR::sacB-<math>\Omega</math>K51373</i> ; <i>sacB-<math>\Omega</math>K</i> from pRMJI digested with Sall and inserted in XhoI site of pBAC1120                                                                                                                                                                                                                                                                                                                                     | This study |
| pBAC1137 | Ap <sup>R</sup> ; $\Delta$ <i>pacI51388</i> ; SOEing of two PCR products; one upstream of <i>pacI</i> (using <u>oST47</u> & <u>oST48</u> ) <sup>b</sup> and the other downstream of <i>pacI</i> (using <u>oST45</u> & <u>oST46</u> ). <sup>b</sup> BamHI and KasI sites replace <i>pacI</i> CDS. PCR product digested and ligated in pUC19.                                                                                                                                                                                       | This study |
| pBAC1138 | Ap <sup>R</sup> ; $\Delta$ <i>tcuC51456</i> ; SOEing of two PCR products: one upstream of <i>tcuC</i> (using <u>oST51</u> & <u>oST52</u> ) <sup>b</sup> and the other downstream of <i>tcuC</i> (PCR with <u>oST49</u> & <u>oST50</u> ). <sup>b</sup> BamHI and KasI sites replace <i>tcuC</i> CDS. DNA inserted in pUC19.                                                                                                                                                                                                        | This study |
| pBAC1141 | Ap <sup>R</sup> Km <sup>R</sup> ; $\Delta$ <i>tcuC::sacB-<math>\Omega</math>K51419</i> ; <i>sacB-<math>\Omega</math>K</i> from pRMJI digested with BamHI inserted in BamHI site of pBAC1138.                                                                                                                                                                                                                                                                                                                                      | This study |
| pBAC1142 | Ap <sup>R</sup> Km <sup>R</sup> ; $\Delta$ <i>pacI::sacB-<math>\Omega</math>K51385</i> ; <i>sacB-<math>\Omega</math>K</i> from pRMJI digested with BamHI inserted in BamHI site of pBAC1137.                                                                                                                                                                                                                                                                                                                                      | This study |
| pBAC1164 | Ap <sup>R</sup> Km <sup>R</sup> ; <i>tclR51445</i> ; ACN1445 sequence surrounding <i>tclR</i> , encoding TcIR(R200Q, L216P), PCR product (with <u>oNSL40</u> & <u>oNSL46</u> ) <sup>b</sup> cloned into pCR2.1 TOPO vector                                                                                                                                                                                                                                                                                                        | This study |
| pBAC1539 | Ap <sup>R</sup> Km <sup>R</sup> ; <i>sacB-<math>\Omega</math>K</i> from pRMJI digested with BamHI inserted in pUC18                                                                                                                                                                                                                                                                                                                                                                                                               | This study |
| pBAC1548 | Ap <sup>R</sup> Sm <sup>R</sup> Sp <sup>R</sup> ; source of <i>sacB-<math>\Omega</math>S</i> ; $\Omega$ S from pUI1638 digested with Eco53KI inserted between Eco53KI and EcoRV of pBAC1539                                                                                                                                                                                                                                                                                                                                       | This study |
| pBAC1863 | Ap <sup>R</sup> Km <sup>R</sup> ; <i>tclR51556</i> ; ACN1556 sequence surrounding <i>tclR</i> , encoding TcIR(R200Q), <sup>b</sup> PCR product (with <u>oNSL40</u> & <u>oNSL46</u> ) <sup>b</sup> cloned into pCR2.1 TOPO vector                                                                                                                                                                                                                                                                                                  | This study |
| pBAC2093 | Ap <sup>R</sup> ; $\Delta$ <i>tclR53171</i> ; SOEing of two PCR products: one upstream of <i>tclR</i> (using <u>oMTV158</u> & <u>oMTV161</u> ) <sup>b</sup> and the other downstream of <i>tclR</i> (using <u>oMTV160</u> & <u>oMTV159</u> ). <sup>b</sup> XhoI site replaces <i>tclR</i> CDS. DNA inserted in pUC18.                                                                                                                                                                                                             | This study |
| pBAC2094 | Ap <sup>R</sup> ; <i>tcuA</i> region $\Delta$ <i>tcuR51376</i> in pUC19; <i>E. coli</i> assembly <sup>c</sup> of two PCR-generated fragments: (1) <i>tcuA</i> region surrounding $\Delta$ <i>tcuR51376</i> (ACN1376 template with <u>oACB69</u> & <u>oACB70</u> ) <sup>b</sup> and (2) vector DNA (pUC19 template with <u>oACB71</u> & <u>oACB72</u> ). <sup>b</sup>                                                                                                                                                              | This study |
| pBAC2095 | Ap <sup>R</sup> Km <sup>R</sup> ; $\Omega$ K downstream of <i>gfp<sub>sf</sub></i> ; <i>E. coli</i> assembly <sup>c</sup> of three PCR-generated fragments (1) <i>gfp<sub>sf</sub></i> (pBTL-2_pcaU_1 template with <u>oACB65</u> & <u>oACB66</u> ) <sup>b</sup> , (2) $\Omega$ K (pUI1637 template with <u>oACB67</u> & <u>oACB68</u> ) <sup>b</sup> , and (3) vector (pUC19 template with <u>oACB63</u> & <u>oACB64</u> ) <sup>b</sup> . Used to make <i>gfp<sub>sf</sub></i> fusion plasmids pBAC2119, pBAC2109, and pBAC2102. | This study |
| pBAC2098 | Ap <sup>R</sup> ; <i>tcuA</i> region in pUC19; <i>E. coli</i> assembly <sup>c</sup> of two PCR-generated fragments: (1) <i>tcuA</i> region (ADP1 template with <u>oACB69</u> & <u>oACB70</u> ) <sup>b</sup> , and (2) vector DNA (pUC19 template with <u>oACB71</u> & <u>oACB72</u> ) <sup>b</sup>                                                                                                                                                                                                                                | This study |
| pBAC2099 | Ap <sup>R</sup> ; <i>tcuC-tcuA</i> DNA in pUC19; <i>E. coli</i> assembly <sup>c</sup> of two PCR products: (1) <i>tcuC-tcuA</i> region (ADP1 template with <u>oACB73</u> & <u>oACB74</u> ) <sup>b</sup> , and (2) vector DNA (pUC19 with <u>oACB75</u> & <u>oACB76</u> ) <sup>b</sup>                                                                                                                                                                                                                                             | This study |
| pBAC2101 | Ap <sup>R</sup> Km <sup>R</sup> ; $\Delta$ <i>tclR::sacB-<math>\Omega</math>K53124</i> ; <i>sacB-<math>\Omega</math>K</i> from pRMJI digested with Sall and inserted in XhoI site of pBAC2093                                                                                                                                                                                                                                                                                                                                     | This study |

**SUPPLEMENTAL MATERIAL** Baugh et al., 2023  
Regulation of tricarboxylate transport and metabolism in *Acinetobacter baylyi* ADP1

|               |                                                                                                                                                                                                                                                                                                                                                                                                                                                                                                                                                                                                                                                                                                              |                          |
|---------------|--------------------------------------------------------------------------------------------------------------------------------------------------------------------------------------------------------------------------------------------------------------------------------------------------------------------------------------------------------------------------------------------------------------------------------------------------------------------------------------------------------------------------------------------------------------------------------------------------------------------------------------------------------------------------------------------------------------|--------------------------|
| pBAC2102      | Ap <sup>R</sup> Km <sup>R</sup> ; $\Delta$ <i>tcuA</i> :: <i>gfp<sub>sf</sub></i> - $\Omega$ K53122; <i>E. coli</i> assembly <sup>c</sup> of two PCR-generated fragments: (1) <i>gfp<sub>sf</sub></i> - $\Omega$ K (from pBAC2095 template with <u><i>oACB79</i></u> and <u><i>oACB80</i></u> ) <sup>b</sup> and (2) vector with ADP1 <i>tcu</i> region DNA (pBAC2094 template with <u><i>oACB79</i></u> and <u><i>oACB80</i></u> ) <sup>b</sup>                                                                                                                                                                                                                                                             | This study               |
| pBAC2109      | Ap <sup>R</sup> Km <sup>R</sup> ; $\Delta$ <i>tcuA</i> :: <i>gfp<sub>sf</sub></i> - $\Omega$ K53122; <i>E. coli</i> assembly <sup>c</sup> of two PCR-generated fragments: (1) <i>gfp<sub>sf</sub></i> - $\Omega$ K (from pBAC2095 template with <u><i>oACB79</i></u> & <u><i>oACB80</i></u> ) <sup>b</sup> and (2) vector with ADP1 DNA for allelic replacement (pBAC2098 template with <u><i>oACB77</i></u> & <u><i>oACB78</i></u> ) <sup>b</sup>                                                                                                                                                                                                                                                           | This study               |
| pBAC2110      | Ap <sup>R</sup> Sm <sup>R</sup> Sp <sup>R</sup> ; $\Delta$ <i>cltA</i> :: <i>sacB</i> - $\Omega$ S53125; <i>E. coli</i> assembly <sup>c</sup> of four PCR-generated fragments: (1) DNA downstream of <i>cltA</i> (ADP1 template with <u><i>oACB54</i></u> & <u><i>oTCB104</i></u> ) <sup>b</sup> , (2) vector DNA (pUC19 template with <u><i>oACB59</i></u> & <u><i>oACB58</i></u> ) <sup>b</sup> , (3) DNA upstream of <i>cltA</i> (ADP1 template with <u><i>oTCB105</i></u> & <u><i>oACB55</i></u> ) <sup>b</sup> and (4) <i>sacB</i> - $\Omega$ S (pBAC1548 template with <u><i>oACB56</i></u> & <u><i>oACB57</i></u> ) <sup>b</sup>                                                                      | This study               |
| pBAC2119      | Ap <sup>R</sup> Km <sup>R</sup> ; insertion of <i>gfp<sub>sf</sub></i> - $\Omega$ K downstream of <i>tcuC</i> and deletion of <i>pacI</i> in the <i>tcuC</i> - <i>tcuA</i> region; <i>E. coli</i> assembly <sup>c</sup> of two PCR-generated fragments (1) <i>tcu</i> region DNA and vector backbone (pBAC2099 template with <u><i>oACB90</i></u> & <u><i>oACB87</i></u> ) <sup>b</sup> , and (2) <i>gfp<sub>sf</sub></i> - $\Omega$ K (pBAC2095 template with <u><i>oACB89</i></u> & <u><i>oACB86</i></u> ) <sup>b</sup>                                                                                                                                                                                    | This study               |
| pBAC2152      | Ap <sup>R</sup> Km <sup>R</sup> ; <i>tcuC</i> to <i>tcuA</i> region with <i>gfp<sub>sf</sub></i> - $\Omega$ K downstream of <i>tcuC</i> and <i>pacI</i> deleted in a pUC19 backbone; <i>E. coli</i> assembly <sup>c</sup> of PCR-generated DNA with pBAC2119 as template using <u><i>oACB151</i></u> & <u><i>oACB152</i></u> to add a ribosome binding site (RBS) for GFP <sub>sf</sub> expression.                                                                                                                                                                                                                                                                                                          | This study               |
| pBAC2158      | Ap <sup>R</sup> Km <sup>R</sup> ; <i>tcuC</i> - <i>gfp<sub>sf</sub></i> - $\Omega$ K53222, $\Delta$ <i>pacI</i> 53222; DNA from <i>tcuC</i> - <i>tcuA</i> with deletion of region downstream of <i>tcuC</i> including <i>pacI</i> ; the deleted DNA was replaced with <i>gfp<sub>sf</sub></i> - $\Omega$ K DNA (sequence shown in Table S1 <sup>c</sup> ); <i>E. coli</i> assembly <sup>c</sup> of two PCR products using pBAC2152 as template: (1) with <u><i>oACB158</i></u> & <u><i>oTCB71</i></u> and (2) with <u><i>oACB159</i></u> & <u><i>oTCB51</i></u> . This assembly moves the <i>tcuC</i> and <i>gfp<sub>sf</sub></i> CDS sufficiently close to create a reporter for P <sub><i>tcuC</i></sub> . | This study               |
| pBAC2161      | Ap <sup>R</sup> Km <sup>R</sup> ; $\Delta$ <i>tcuR</i> 51376; <i>tcuC</i> - <i>gfp<sub>sf</sub></i> - $\Omega$ K53222, $\Delta$ <i>pacI</i> 53222; Derivative of pBAC2158 in which <i>tcuR</i> was deleted by <i>E. coli</i> assembly <sup>c</sup> of two PCR products made using pBAC2158 as template: (1) with <u><i>oACB76</i></u> & <u><i>oTCB161</i></u> and (2) with <u><i>oACB73</i></u> & <u><i>oTCB162</i></u>                                                                                                                                                                                                                                                                                      | This study               |
| pUI1637       | Ap <sup>R</sup> Km <sup>R</sup> ; source of $\Omega$ K                                                                                                                                                                                                                                                                                                                                                                                                                                                                                                                                                                                                                                                       | (4)                      |
| pUI1638       | Ap <sup>R</sup> Sp <sup>R</sup> Sm <sup>R</sup> ; source of $\Omega$ S                                                                                                                                                                                                                                                                                                                                                                                                                                                                                                                                                                                                                                       | (4)                      |
| pBTL-2_pcaU_1 | Km <sup>R</sup> ; source of <i>gfp<sub>sf</sub></i>                                                                                                                                                                                                                                                                                                                                                                                                                                                                                                                                                                                                                                                          | (5)                      |
| pRMJI         | Ap <sup>R</sup> Km <sup>R</sup> ; source of <i>sacB</i> - $\Omega$ K                                                                                                                                                                                                                                                                                                                                                                                                                                                                                                                                                                                                                                         | (6)                      |
| pUC18/19      | Ap <sup>R</sup> ; cloning vector                                                                                                                                                                                                                                                                                                                                                                                                                                                                                                                                                                                                                                                                             | (7)                      |
| pCR2.1 TOPO   | Ap <sup>R</sup> , Km <sup>R</sup> ; cloning vector                                                                                                                                                                                                                                                                                                                                                                                                                                                                                                                                                                                                                                                           | Thermo Fisher Scientific |

<sup>a</sup>Abbreviations: Ampicillin (Ap), Streptomycin (Sm), Spectinomycin (Sp), Kanamycin (Km), omega cassette conferring Km<sup>R</sup> ( $\Omega$ K) or Sm<sup>R</sup>Sp<sup>R</sup> ( $\Omega$ S) (4); splicing by overlap extension PCR (SOEing) (8).

<sup>b</sup>Oligos (primers) used for PCR are underlined and shown in Table S4.

<sup>c</sup>*E. coli* assembly refers to the method of Kostylev et al. (9). PCR products for this method were typically generated with PrimeSTAR polymerase.

**SUPPLEMENTAL MATERIAL** Baugh et al., 2023  
Regulation of tricarboxylate transport and metabolism in *Acinetobacter baylyi* ADP1

**TABLE S4** Oligos (Primers) used for PCR in this study

| Name   | Sequence (5'-3')                                      | Use                                                                                                                                                             |
|--------|-------------------------------------------------------|-----------------------------------------------------------------------------------------------------------------------------------------------------------------|
| oACB54 | CGGATCGTACCGGGCTGATCATGCTGT<br>GACTCTGTTTCG           | With oTCB104 amplifies <i>cltA</i> downstream region from ADP1 template to make pBAC2110                                                                        |
| oACB55 | CTGTTGCATGGGCCTGCAAACGACTCTC<br>CATCATTTGTCTGT        | With oTCB105 amplifies <i>cltA</i> upstream region from ADP1 template to make pBAC2110                                                                          |
| oACB56 | ACAGACAAATGATGGAGAGTCGTTTGCA<br>GGCCCATGCAACAG        | With oACB57 amplifies <i>sacB</i> - $\Omega$ S from pBAC1548 template to make pBAC2110                                                                          |
| oACB57 | CGAAACAGAGTCACAGCATGATCAGGCC<br>CGGTACGATCCG          | With oACB56 amplifies <i>sacB</i> - $\Omega$ S from pBAC1548 template to make pBAC2110                                                                          |
| oACB58 | TGTAATACAAAGTCAGCGTATTGATGCT<br>TGGCGTAATCATGGTCATAGC | With oACB59 amplifies vector DNA (pUC19) to make pBAC2110                                                                                                       |
| oACB59 | ATGACTATGCTGCTTTTCTTCTGCTGTG<br>CGGTATTTACACCG        | With oACB58 amplifies vector DNA (pUC19) to make pBAC2110                                                                                                       |
| oACB63 | TCTACCGGGACGGCCAGTGAATTCGAG                           | With oACB64 amplifies vector DNA (pUC19 template); used to make pBAC2095                                                                                        |
| oACB64 | TGCTAGCCATCTCCTTACGCATCTGTGC                          | With oACB63 amplifies amplifies vector DNA (pUC19 template); used to make pBAC2095                                                                              |
| oACB65 | GCGTAAGGAGATGGCTAGCAAAGGAGAA<br>G                     | With oACB66 amplifies <i>gfp<sub>sf</sub></i> from pBTL-2_pcaU_1 template; used to make pBAC2095                                                                |
| oACB66 | GTACCAGCTTTACCTAGGTGTGAATTC<br>AG                     | With oACB65 amplifies <i>gfp<sub>sf</sub></i> from pBTL-2_pcaU_1 template; used to make pBAC2095                                                                |
| oACB67 | ACCTAGGTAAAGCTCGGTACGATCCGGT<br>G                     | With oACB68 amplifies $\Omega$ K from pUI1637 template; used to make pBAC2095                                                                                   |
| oACB68 | CACTGGCCGTGCCCGGTAGATCCGGTGA<br>TTG                   | With oACB67 amplifies $\Omega$ K from pUI1637 template; used to make pBAC2095                                                                                   |
| oACB69 | CGTAAGGAGAATCCTGACGCAGTTGTTG                          | With oACB70 amplifies <i>tcuA</i> region from ACN1376 or ADP1 to make pBAC2094 or pBAC2098, respectively                                                        |
| oACB70 | CACTGGCCGTGATGGCAAATTTGAGTA<br>AAG                    | With oACB69 amplifies <i>tcuA</i> region from ACN1376 or ADP1 to make pBAC2094 or pBAC2098, respectively                                                        |
| oACB71 | TTTGCCATCGACGGCCAGTGAATTCGAG                          | With oACB72 amplifies vector DNA (pUC19 template); used to make pBAC2094 and pBAC2098                                                                           |
| oACB72 | GCGTCAGGATTCTCCTTACGCATCTGTG                          | With oACB71 amplifies vector DNA (pUC19 template); used to make pBAC2094 and pBAC2098                                                                           |
| oACB73 | CGTAAGGAGACAGACCAAGGAGGTCTTA<br>ATG                   | With oACB74 amplifies <i>pacI</i> region from ADP1 to make pBAC2099; with oTCB162 amplifies <i>gfp<sub>sf</sub></i> - $\Omega$ K from pBAC2158 to make pBAC2161 |
| oACB74 | CACTGGCCGTAGAGCTGAACAACCTGGAA<br>TTAAG                | With oACB73 amplifies <i>pacI</i> region from ADP1 to make pBAC2099                                                                                             |
| oACB75 | GTTCAGCTCTACGGCCAGTGAATTCGAG                          | With oACB76 amplifies the vector DNA (pUC19); used to make pBAC2099                                                                                             |
| oACB76 | CCTTGGTCTGTCTCCTTACGCATCTGTG                          | With oACB75 amplifies the vector DNA (pUC19); used to make pBAC2099; with oTCB161 amplifies vector region of pBAC2158 to make pBAC2161                          |
| oACB77 | TCTACCGGGCTAGTACTAAAGCCTTAAT<br>TCC                   | With oACB78 amplifies pUC19 backbone and genes upstream and downstream of <i>tcuA</i> from pBAC2094 to make pBAC2102 or from pBAC2098 to make pBAC2109          |
| oACB78 | TGCTAGCCATAGATTCTTCTTTTTC<br>GCTC                     | With oACB77 amplifies pUC19 backbone and genes upstream and downstream of <i>tcuA</i> from pBAC2094 to make pBAC2102 or from pBAC2098 to make pBAC2109          |
| oACB79 | GAAGAAATCTATGGCTAGCAAAGGAGAA<br>GAACTTTTTC            | With oACB80 amplifies <i>gfp<sub>sf</sub></i> - $\Omega$ K from pBAC2095 to make pBAC2102 and pBAC2109                                                          |

**SUPPLEMENTAL MATERIAL** Baugh et al., 2023  
Regulation of tricarboxylate transport and metabolism in *Acinetobacter baylyi* ADP1

|         |                                                                          |                                                                                                                                   |
|---------|--------------------------------------------------------------------------|-----------------------------------------------------------------------------------------------------------------------------------|
| oACB80  | TTTAGTACTAGCCCCGGTAGATCCGGTGA<br>TTG                                     | With oACB79 amplifies <i>gfp<sub>sf</sub></i> -ΩK from pBAC2095 to make pBAC2102 and pBAC2109                                     |
| oACB86  | AGAGCTTTTAGCCCCGGTAGAT<br>CCGGTGATTG                                     | With oACB89 amplifies <i>gfp<sub>sf</sub></i> -ΩK from pBAC2095 to make pBAC2119                                                  |
| oACB87  | TCTACCGGGCTAAAAGCTCTAAAAGGCA<br>G                                        | With oACB90 amplifies pUC19 backbone and genes upstream of downstream of <i>pacI</i> from pBAC2099 to make pBAC2119 (             |
| oACB89  | GTGAGTTACTATGGCTAGCAAAGGAGAA<br>GAACTTTTTC                               | With oACB86 amplifies <i>gfp<sub>sf</sub></i> -ΩK from pBAC2095 to make pBAC2119                                                  |
| oACB90  | TTGCTAGCCATAGTAACTCACTTGAAGG<br>AC                                       | With oACB87 amplifies pUC19 backbone and genes upstream of downstream of <i>pacI</i> from pBAC2099 to make pBAC2119               |
| oACB151 | TCCTCCTGAAGGACACAAGAACACAGC                                              | With oACB152 to put a RBS ahead of <i>gfp<sub>sf</sub></i> in pBAC2119                                                            |
| oACB152 | GTCCTTCAGGAGGACAGCTATGGCTAGC<br>AAAGGAGAAGAACTTTTC                       | With oACB151 to put a RBS ahead of <i>gfp<sub>sf</sub></i> in pBAC2119                                                            |
| oACB158 | ATAGCTGTCCTCCTGAAGGAAATGATGC<br>TGACGTGTTAGAC                            | With oTCB71 amplifies backbone and flanking DNA from pBAC2152 to make pBAC2158                                                    |
| oACB159 | GTCTAACACGTCAGCATCATTTCCCTTCA<br>GGAGGACAGCTATG                          | With oTCB51 amplifies <i>gfp<sub>sf</sub></i> -ΩK from pBAC2152 to make pBAC2158                                                  |
| oMTV152 | GAGTCAGAGCTCCGCAAACACAGGTGGC<br>A                                        | With oMTV155 amplifies DNA downstream of <i>tcuR</i> ; used to make pBAC1120; <i>SacI</i> site for cloning into pUC18.            |
| oMTV153 | GATGATCTGCAGTCTCAAGCCTGTATTT<br>ATGCC                                    | With oMTV154 amplifies DNA upstream of <i>tcuR</i> ; used to make pBAC1120; <i>PstI</i> site for cloning into pUC18.              |
| oMTV154 | GTAATAATAAATACAAATGGCTTACTCG<br>AGCACGGCAAATACTACATTGTC                  | With oMTV153 amplifies DNA upstream of <i>tcuR</i> ; used to make pBAC1120; <i>XhoI</i> site introduced                           |
| oMTV155 | GACAATGTAGTATTTGCCGTGCTCGAGT<br>AAGCCATTTGTATTTATTTTAC                   | With oMTV152 amplifies DNAdownstream of <i>tcuR</i> ; used to make pBAC1120; <i>XhoI</i> site introduced.                         |
| oMTV158 | GAGTCAGAGCTCCGGTGCTAAAAATTT<br>TTGGTCGT                                  | <i>tcIR</i> region; used with oMTV161 to make pBAC2093; <i>SacI</i> site for cloning into pUC18                                   |
| oMTV159 | GATGATCTGCAGTACACCAGTATTTGGG<br>CATATCCT                                 | <i>tcIR</i> region; used with oMTV160 to make pBAC2093; <i>PstI</i> site for cloning into pUC18                                   |
| oMTV160 | GTATTTAAAAAATTAATGACCCTTTAC<br>TCGAGGGTTGAAAAATTTTGATTGTT<br>TGATTCCAT   | <i>tcIR</i> region; used with oMTV159 to make pBAC2093; <i>XhoI</i> site introduced                                               |
| oMTV161 | ATGGAAATCAAACAATCAAATATTTT<br>CAACCCTCGAGTAAAGGGTCATTAATTT<br>TTTTAAATAC | <i>tcIR</i> region; used with oMTV158 to make pBAC2093; <i>XhoI</i> site introduced                                               |
| oNSL40  | CAGACCTTTACGACGTCCC                                                      | With oNSL46 amplifies <i>tcIR</i> ; put in pCR2.1 TOPO vector for pBAC1164 ( <i>tcIR51445</i> ) and pBAC1863 ( <i>tcIR51556</i> ) |
| oNSL46  | TTCTGAGTTACGTTATCTGC                                                     | With oNSL40 amplifies <i>tcIR</i> ; put in pCR2.1 TOPO vector for pBAC1164 ( <i>tcIR51445</i> ) and pBAC1863 ( <i>tcIR51556</i> ) |
| oST45   | CATGTGGACGTCGCTGTATAGCCATTG<br>TGGA                                      | <i>pacI</i> region; used with oST46 to make pBAC1137. <i>AatII</i> site for cloning into pUC19.                                   |
| oST46   | TGCTCTCAAGTGAGTTACTATGGATC<br>CGGGCCCTAAAAGCTCTAAAAGGCAGCA<br>T          | <i>pacI</i> region; used with oST45 to make pBAC1137. <i>BamHI</i> and <i>KasI</i> sites introduced.                              |
| oST47   | ATGCTGCCTTTAGAGCTTTTAGCGCC<br>GGATCCCATAGTAACTCACTTGAAGGAC<br>A          | <i>pacI</i> region; used with oST48 to make pBAC1137. <i>BamHI</i> and <i>KasI</i> sites introduced.                              |
| oST48   | ATAACTGTCGACACCTATGGGTGGCTTG<br>CT                                       | <i>pacI</i> region; used with oST46 to make pBAC1137. <i>SalI</i> site for cloning into pUC19.                                    |
| oST49   | CATGTGGACGTCATTCGACCCGGTGAAA<br>GCTTG                                    | <i>tcuC</i> region; used with oST50 to make pBAC1138. <i>AatII</i> site for cloning into pUC19.                                   |
| oST50   | TTTCAGACCAAGGAGGTCTTAATGGAT<br>CCGGCCCTAACACGTCAGCATCATTTG               | <i>tcuC</i> region; used with oST49 to make pBAC1138. <i>BamHI</i> and <i>KasI</i> sites introduced.                              |
| oST51   | CAAATGATGCTGACGTGTTAGCGCCGG<br>ATCCCATTAAGACCTCCTTGGTCTGAAA              | <i>tcuC</i> region; used with oST52 to make pBAC1138. <i>BamHI</i> and <i>KasI</i> sites introduced.                              |



**SUPPLEMENTAL MATERIAL** Baugh et al., 2023  
Regulation of tricarboxylate transport and metabolism in *Acinetobacter baylyi* ADP1

|         |                                                                      |                                                                                                         |
|---------|----------------------------------------------------------------------|---------------------------------------------------------------------------------------------------------|
| oST52   | GATCTCGTCGACGGTGTATGAGATTGAT<br>GGCC                                 | <i>tcuC</i> region; used with oST51 to make pBAC1138. <u>S</u> alI site for cloning into pUC19.         |
| oST63   | TGAAGCATTATACAGGGTTATTGTCTCA<br>TGAGCG                               | Used with primer M13R to generate DNA ofr transformation to make ACN1419                                |
| oTCB5   | CTTTAACCAAGGGCTGAATG                                                 | In <i>tcIR</i> for RACE                                                                                 |
| oTCB6   | GCTGCCTTGCACTAACTAAAG                                                | In <i>tcuR</i> for RACE                                                                                 |
| oTCB8   | ACAAGTACAACCTGGCGCTTAGG                                              | In <i>tcuC</i> for RACE                                                                                 |
| oTCB44  | CCATTTTTTCAGACCAAGG                                                  | Upstream of <i>tcuC</i> ; used with oTCB113 for cDNA evaluation                                         |
| oTCB45  | GATAAGTCGTTTGAAGCTGG                                                 | Upstream of <i>tcuC</i> ; used with oTCB113 for cDNA evaluation                                         |
| oTCB51  | TAAGCGCCAGTTGTACTTGT                                                 | With oACB159 amplifies <i>gfp<sub>sf</sub></i> -ΩK from pBAC2152 to make pBAC2158                       |
| oTCB55  | TGCCTTTTAAAGCTACATTAG                                                | Upstream of <i>tcuA</i> ; used with oTCB135 for cDNA evaluation                                         |
| oTCB56  | GCTAAAAAAGGAAGAAATCTATGC                                             | Upstream of <i>tcuA</i> ; used with oTCB135 for cDNA evaluation                                         |
| oTCB57  | ATCAGACCTTACGACGTC                                                   | In <i>tcuA</i> for RACE                                                                                 |
| oTCB71  | ACAAGTACAACCTGGCGCTTAGG                                              | With oACB158 amplifies backbone and flanking DNA from pBAC2152 to make pBAC2158                         |
| oTCB104 | GCAGAAGAAAAGCAGCATAG                                                 | With oACB54 amplifies <i>cltA</i> downstream region from ADP1 to make pBAC2110                          |
| oTCB105 | CATCAATACGCTGACTTTGT                                                 | With oACB55 amplifies <i>cltA</i> upstream region from ADP1 template to make pBAC2110                   |
| oTCB113 | TGACCAACCAGCTTAAAAC                                                  | In <i>tcuC</i> ; used with oTCB44, oTCB45, oTCB144, and oTCB145 for cDNA evaluation                     |
| oTCB135 | TCGCTTTTGGGATGTTTAC                                                  | In <i>tcuB</i> for 5' RACE                                                                              |
| oTCB137 | TGTGGATCGACATACCC                                                    | In <i>pacI</i> for 5' RACE                                                                              |
| oTCB144 | CCTGCCACATGATAAATGAATTG                                              | Upstream of <i>tcuC</i> ; used with oTCB113 for cDNA evaluation                                         |
| oTCB145 | ACTCCTTTTCTGTTTTTCCTCG                                               | Upstream of <i>tcuC</i> ; used with oTCB113 for cDNA evaluation                                         |
| oTCB154 | AGCTTAAGGTTTTTGCATCTAGC                                              | In <i>tcuA</i> ; used with oTCB156, oTCB56, oTB55, and oTCB155 for cDNA evaluation                      |
| oTCB155 | ACACCCATTCAAGCTGAGC                                                  | Upstream of <i>tcuA</i> ; used with oTCB135 for cDNA evaluation                                         |
| oTCB156 | GCATGATGTGATTGTCATTGG                                                | Upstream of <i>tcuA</i> ; used with oTCB135 for cDNA evaluation                                         |
| oTCB161 | GGACAATGTAGTATTTGCCGTGGAACCTC<br>TAAGCCATTTGTATTTATTTTACTAAA<br>CACC | With oACB76 amplifies pUC19 backbone from pBAC2158 to make pBAC2161                                     |
| oTCB162 | GGTGTTAGTAAAAATAAATACAAATGG<br>CTTAGAGTTCCACGGCAAATACTACATT<br>GTCC  | With oACB73 amplifies <i>gfp<sub>sf</sub></i> -ΩK from pBAC2158 to make pBAC2161                        |
| M13R    | AGCGGATAACAATTTACACAGG                                               | Universal reverse primer for sequencing from pUC18/19 vectors; used with oST63 for constructing ACN1419 |

**SUPPLEMENTAL MATERIAL** Baugh et al., 2023  
**Regulation of tricarboxylate transport and metabolism in *Acinetobacter baylyi* ADP1**

|                                        |                                                                                                                         |     |
|----------------------------------------|-------------------------------------------------------------------------------------------------------------------------|-----|
| <i>A. baylyi</i> ADP1 Pacl             | --MKKSPIVLSMC---LAGAGLSTFTHADTLEVTSSGGFYSSMEKLLPLFEKQTGHTVH                                                             | 55  |
| <i>Cur. delicatus</i> CDE01S_RS06450   | --MKFTWQTLRMAWLVGVGLILAAGMALADEIKVLSGGFTAAYKQLVPLYEQASGHKVI                                                             | 58  |
| <i>Cup. taiwanensis</i> RALTA_RS24780  | --MKLNI PAGKRALL--VFVWLAAAPAWADEIRVLTSSGGFTAAYQQLVPLYEAAQTQDRVI                                                         | 56  |
| <i>X. autotrophicus</i> XAUT_RS11440   | MTIARSWLSALLVGATL----VLPAAARADEVVRVMSGGFSAAYKQLVPEQEQATGHKVS                                                            | 56  |
| <i>P. sacchari</i> NH14_RS25980        | ---MKNLL-LKLC AATLVATSAAGANVQAADLHVMSGGFTAAYKLLGPKFAAETGNTLD                                                            | 56  |
| <i>Aq. denitrificans</i> GSR16_RS11475 | --MAMKWKPGCGLAALLAFSC--TQAMADQLTVVSSGGFAAALKLLAPRFEQETGHQLK                                                             | 56  |
| <i>Pseudomonas</i> sp. WU-0701 AI      | ---MFPRLPTLALGALLASTPLLAAQPVTTLTVLSSGGIMGTIREVAFAYEKAATGVKLD                                                            | 57  |
| <i>Ps. oryzihabitans</i> APT59_12225   | ---MFPRLPTLALGALLASTPLLAAQPVTTLTVLSSGGIMGTIREVAFAYEKAATGVKLD                                                            | 57  |
|                                        |                                                                                                                         |     |
| <i>A. baylyi</i> ADP1 Pacl             | LSSGSMGASPTAIPNRLDRGERFDVVM LAAP ELSKLA EKGVDPHSQRALVNSSTIGMAV                                                          | 115 |
| <i>Cur. delicatus</i> CDE01S_RS06450   | SSYGASGIGNAPDSIPSRRLARGEQFDLILLS DAGLEALVKQGHVVP GSRVLDLGRSITGLSV                                                       | 118 |
| <i>Cup. taiwanensis</i> RALTA_RS24780  | TAYGASMGNAPDSIPSRRLARGETFDVVI LADSGLDKLV EQGKVAAGSRVLDLARSLIGMSV                                                        | 116 |
| <i>X. autotrophicus</i> XAUT_RS11440   | TAYGSPMGTTENAIPVRLARGEFPVDLIMVGEALTGLTEQ GKADKASRVDLARSPGVAV                                                            | 116 |
| <i>P. sacchari</i> NH14_RS25980        | TALGSPMGKSP E AIPNRLARGEPA DAVIMVGYALDEL I KEKVI PGSRVLEADSRIGMVV                                                       | 116 |
| <i>Aq. denitrificans</i> GSR16_RS11475 | LEWGP SMGDT PQAIPQRLARGEKIDVLMVGSALDQLQAQGRV VADSNTPLAASRTALAV                                                          | 116 |
| <i>Pseudomonas</i> sp. WU-0701 AI      | I A A A P S M G D T P Q A I P N R L A R N E P A D V V L M V G S A L D K L V A S G Q V A K D S R V D L G Q S F T A M A V | 117 |
| <i>Ps. oryzihabitans</i> APT59_12225   | I A A A P S M G D T P Q A I P N R L A R N E P A D V V L M V G S A L D K L V A S G Q V A K D S R V D L G Q S F T A M A V | 117 |
|                                        |                                                                                                                         |     |
| <i>A. baylyi</i> ADP1 Pacl             | PKGAPKPDISSAAKFEQVLLNAKHIGYSA S ASGTHLEKDVFPSPFPVYKLISSKAEKVV                                                           | 175 |
| <i>Cur. delicatus</i> CDE01S_RS06450   | RKGT PKPDISTVDALRQTLLNAKSIAYSASASGTYLSTELFPR LGVAE--QLKDKAKKIY                                                          | 176 |
| <i>Cup. taiwanensis</i> RALTA_RS24780  | RKGT PKPDISTAEALKQTL LNAKSIAYSASASGTYL SSEL FPR LGVAE--QIQDKARKIY                                                       | 174 |
| <i>X. autotrophicus</i> XAUT_RS11440   | RAGAPKPDISSVDGLRAALLAAKSIAYS DSASGVYVENE LFKRLGIQE--QMKGKARMIP                                                          | 174 |
| <i>P. sacchari</i> NH14_RS25980        | REGA AKPDISSADGLRQALLHAKSIAYS DSASGVYIEREL FEKLGVEE--QVKPKAKMIP                                                         | 174 |
| <i>Aq. denitrificans</i> GSR16_RS11475 | KHGSFPQPDISTLAALKQTL LNSHSIAYS DSASGVFLSTV LFSRLGVAE--QIKDRSRMIP                                                        | 174 |
| <i>Pseudomonas</i> sp. WU-0701 AI      | RQGAPKPDISNMDAFKQTL EKAQSVAYS DSASGVYLSRI L FPRMQLDK--SFM AKARMIP                                                       | 175 |
| <i>Ps. oryzihabitans</i> APT59_12225   | RQGAPKPDISNMDAFKQTL EKAQSVAYS DSASGVYLSRI L FPRMQLDK--SFM AKARMIP                                                       | 175 |
|                                        |                                                                                                                         |     |
| <i>A. baylyi</i> ADP1 Pacl             | GDRVAKRTAEGQFDI GFQQISEIKPFTQYQGVDDVGP I P A P Y Q K V T V F A A G I G K H S E H A                                      | 235 |
| <i>Cur. delicatus</i> CDE01S_RS06450   | SERVGAVVARGDAELG FQQVSELLPFSE---LDYVGPLPEVQQTIFFSAGIGAQA KAP                                                            | 232 |
| <i>Cup. taiwanensis</i> RALTA_RS24780  | SERVGAVVARGDAELG FQQVSELLPFKE---LDYVGPLPAELQQRVFFSAGTVAGRQ-S                                                            | 229 |
| <i>X. autotrophicus</i> XAUT_RS11440   | AEPVAVVARGDAELG FQQVSELLPVAG---VEVVGPIPE SVQKITIFAAGISTKAVSA                                                            | 230 |
| <i>P. sacchari</i> NH14_RS25980        | RIPVASVVANGDYELG FQQVSELLPVKG---ASFV GKIPELQSVTRFAAGIPVNAQHP                                                            | 230 |
| <i>Aq. denitrificans</i> GSR16_RS11475 | AEPVGVVARGDAELG FQQVSELIPIAG---IDIVGLLPEQAQVTF SAGISRDSGHP                                                              | 230 |
| <i>Pseudomonas</i> sp. WU-0701 AI      | AEPVGVVARGEAQLG FQQVSELKAVSG---IDIVGLIPDQAQKMTLYSGAMVSKSQHP                                                             | 231 |
| <i>Ps. oryzihabitans</i> APT59_12225   | AEPVGVVARGEAQLG FQQVSELKAVSG---IDIVGLIPDQAQKMTLYSGAMVSKSQHP                                                             | 231 |
|                                        |                                                                                                                         |     |
| <i>A. baylyi</i> ADP1 Pacl             | KAAKELIQFVKSQAATQTIEEQGLEQVKQ-----                                                                                      | 264 |
| <i>Cur. delicatus</i> CDE01S_RS06450   | EAA RHLVRYLAS PAAASIVRSTGLEPVSSIK-----                                                                                  | 263 |
| <i>Cup. taiwanensis</i> RALTA_RS24780  | A A A S R F I R F L A S P A A A S I V S S T G L E P V A T P L Q P P A P P A L G P A Q M R                               | 274 |
| <i>X. autotrophicus</i> XAUT_RS11440   | KAGADLLAFLASAQAAPVIRKTLGDP T A H P A G K -----                                                                          | 263 |
| <i>P. sacchari</i> NH14_RS25980        | KEAKALLDYLASPGVQAEVKATGLDSVSTH-----                                                                                     | 260 |
| <i>Aq. denitrificans</i> GSR16_RS11475 | A A A R Q L L R F L A S P Q V A A S I R Q T G M T P V S T S A Q -----                                                   | 262 |
| <i>Pseudomonas</i> sp. WU-0701 AI      | E A A R A L L Q Y L A S K D A A K A I E D S G L K P V P A Q P -----                                                     | 262 |
| <i>Ps. oryzihabitans</i> APT59_12225   | E A A R A L L Q Y L A S K D A A K A I E D S G L K P V P A Q P -----                                                     | 262 |

**FIG S1** Aligned sequences of Pacl from ADP1 (top line), aconitate isomerase from *Pseudomonas* sp. WU-0701 (second from bottom), and similar proteins, including those corresponding to products of *pacI*-like genes, shown in pink in Fig. 2. The protein from WU-0701 has been biochemically characterized (10, 11). It differs by one amino acid from an uncharacterized protein in another *Pseudomonas* strain, marked by the red rectangle. This enzyme is presumed to be an aconitate isomerase. Identical and similar residues in 6 or more aligned sequences are highlighted in blue and grey, respectively. Locus tags are shown adjacent to the bacterial names. Database protein identifiers (from NCBI), in the order from top to bottom, are WP\_004925208 (Pacl from ADP1), WP\_245636122, WP\_012356708, ABS67519, WP\_035529914, WP\_159877488, BAP90747 (aconitate isomerase), and WP\_059315091.

**A**

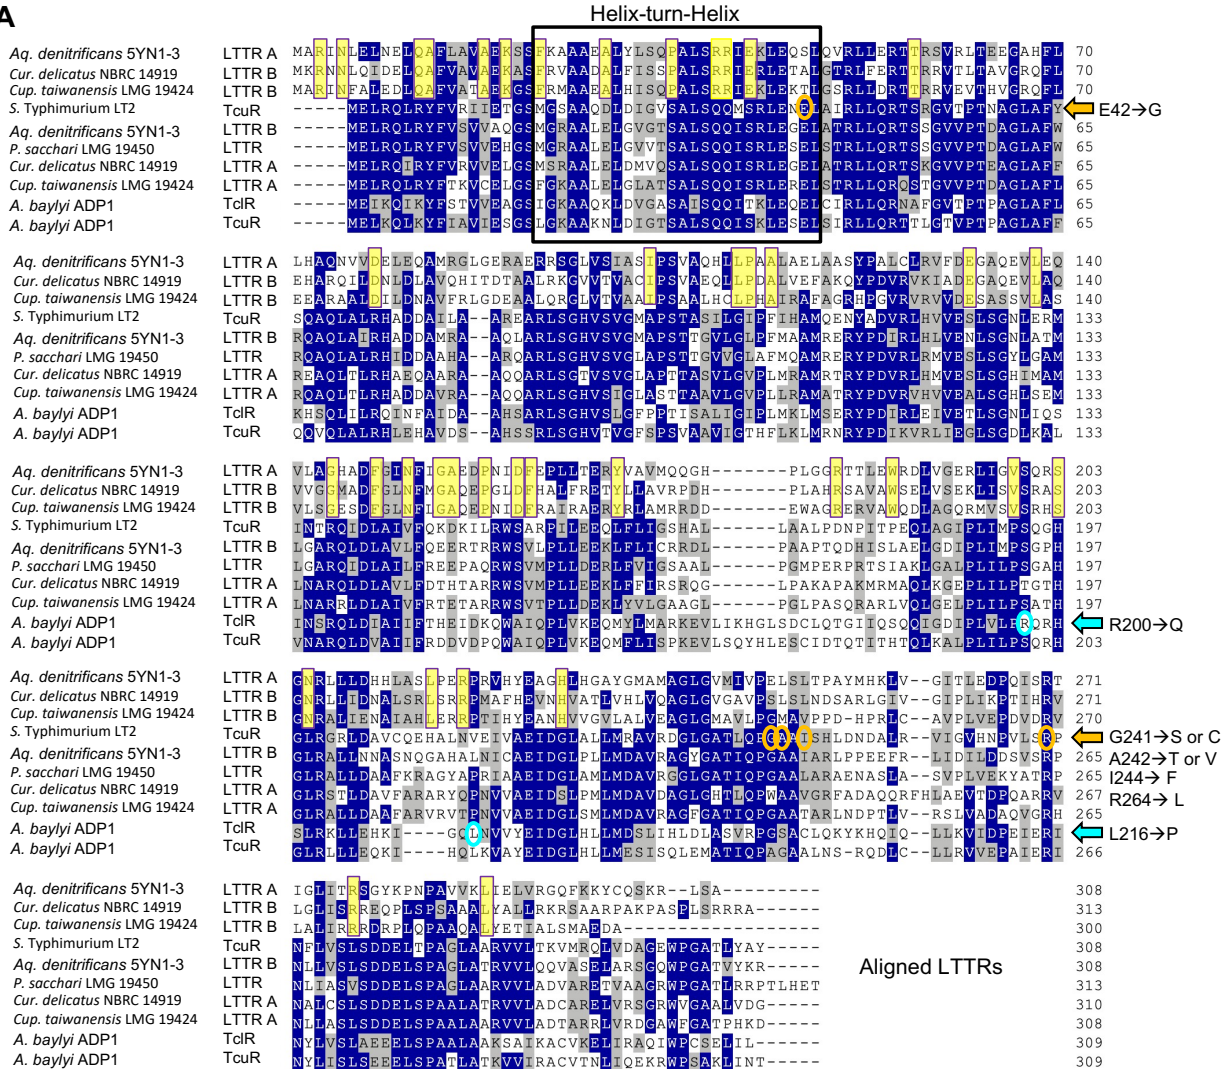

**FIG S2** Aligned sequences of LTRs, corresponding to the genes shown in Fig. 2. (A) Identical and similar aligned residues that are in at least 5 sequences are highlighted in blue and grey, respectively. The top three sequences, which correspond to the striped genes in Fig. 2, are more like each other than to the rest of the sequences (Fig. S3). Yellow boxes highlight residues that are identical in only these three sequences. Orange circles and arrows indicate the positions of amino acid replacements in TcuR variants in LT2 that activate transcription of the *tcuABC* operon without requiring Tcb (12). Turquoise circles and arrows indicate the positions of amino acid replacements in TcLR variants in ADP1 that are more responsive to Tcb than TcLR at both  $P_{tcuC}$  and  $P_{tcuA}$ . (B) The helix-turn-helix (HTH) region of the proteins, identified by alignments with known structures, are similar for TcuR and TcLR of ADP1. Protein identifiers, in the NCBI

database, follow, with bold numbers corresponding to those in the phylogram shown in Fig. S3 below: *A. baylyi* ADP1 TcuR (WP\_004925211.1, **10**) and TcIR (WP\_004925203.1, **9**); *Aquitalea denitrificans* LTTR A (WP\_159877486.1, **1**) and LTTR B (WP\_159877492.1, **5**), *Cupriavidus taiwanensis* LTTR A (WP\_012356032.1, **8**) and LTTR B (WP\_012356709.1, **3**), *Curvibacter delicatus* LTTR A (WP\_066705128.1, **7**) and LTTR B (WP\_066705121.1, **2**), *Paraburkholderia sacchari* LTTR (WP\_035529905.1, **6**), *S. enterica* LT2 TcuR (NP\_459677.1, **4**).

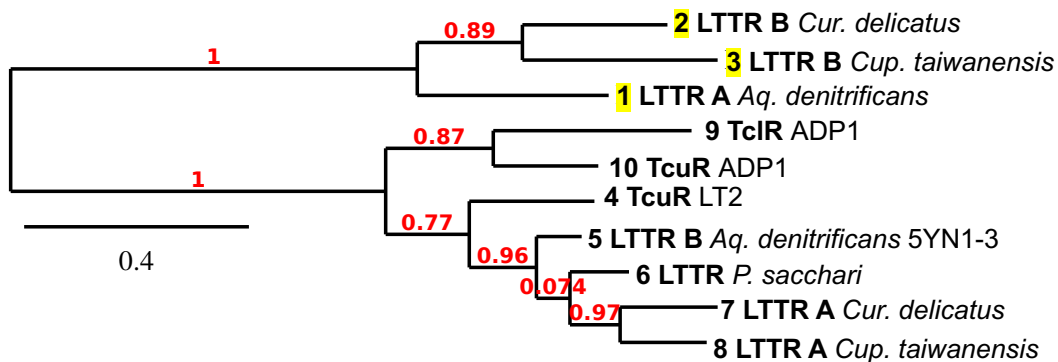

**FIG S3** Phylogenetic tree (phylogram) generated from the sequences of LTTRs shown in Fig. S2. The labeled leaves (tips) indicate proteins that correspond to LTTR proteins in Fig. 2 and Fig. S2. Numbers 1-10 represent sequences from top to bottom in the alignment of Fig. S2. The tree was generated with default parameters at [www.phylogeny.fr](http://www.phylogeny.fr) for the “one click” analysis (13). The scale marks the distance corresponding to a 0.4 (40%) genetic variation. Red text displays the branch support values. This phylogram supports the conclusion that protein sequences 1-3 (highlighted in yellow) group together by sequence similarity and are more closely related to each other than to the other regulators. There are two main branches: one leading to sequences (1-3) and the other for the remaining sequences (4-10). These two main branches have support values of 1 (100%).



**SUPPLEMENTAL MATERIAL** Baugh et al., 2023  
 Regulation of tricarboxylate transport and metabolism in *Acinetobacter baylyi* ADP1

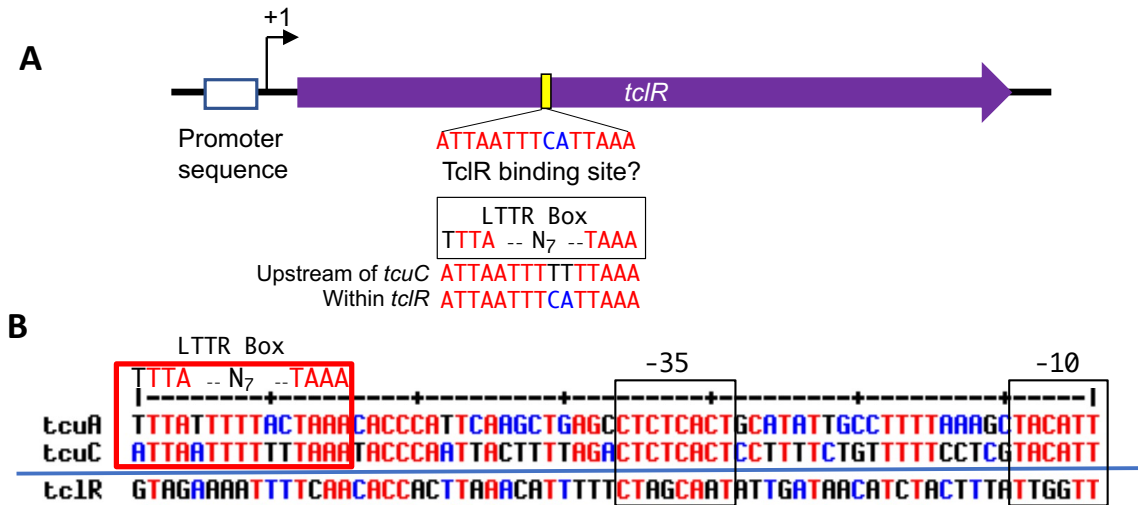

**FIG S4** Transcription of *tclR*. (A) Diagram, drawn to scale, of *tclR* chromosomal region. The position of the transcriptional initiation site (+1) is indicated relative to the position of the *tclR* coding sequence (purple arrow). The yellow rectangle indicates the position of a sequence that matches the LTTT box, which is predicted to bind TcIR upstream of *tclC*. The rectangle upstream of the +1 site indicates the position of the promoter sequence shown in the lower panel (bottom line). (B) Alignment of three promoter regions for *tclA*, *tclC*, and *tclR* upstream of the known +1 sites for each gene. There is similarity among all three sequences in the vicinity of the promoter (-35 and -10 regions). The LTTT Box sequence that is conserved in both *tclA* and *tclC* (TTA-N<sub>7</sub>-TAAA), located at position approximately -63, is not observed for *tclR*.

**SUPPLEMENTAL MATERIAL** Baugh et al., 2023  
 Regulation of tricarboxylate transport and metabolism in *Acinetobacter baylyi* ADP1

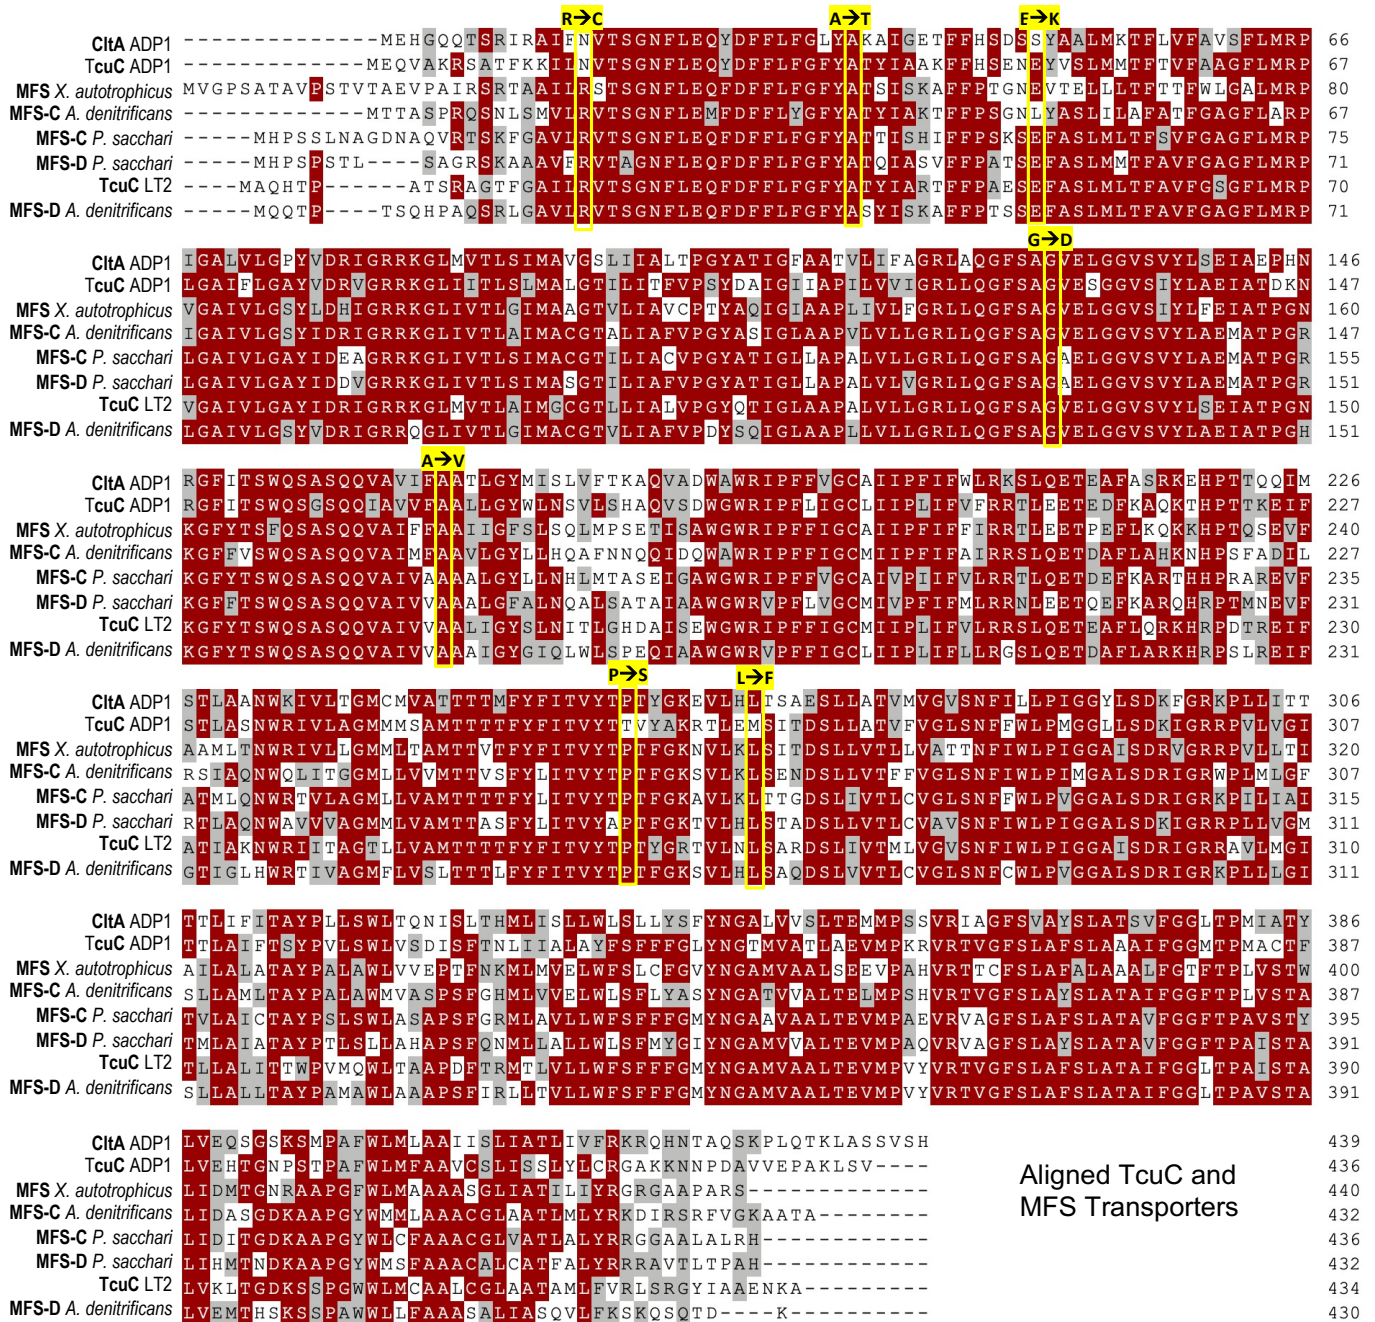

**FIG S5** Alignment of MFS member transporters. Proteins from top to bottom in the alignment correspond to (NCBI protein identifier): **CitA**, locus tag ACIAD\_RS01830, from ADP1 (WP\_004920407.1); **TcuC**, locus tag ACIAD\_RS07100, from ADP1 (WP\_004925205); **MFS X. autotrophicus** (WP\_012114294.1); **MFS-C A. denitrificans** (WP\_159877490.1); **MFS-C P. sacchari** (WP\_035529909.1); **MFS-D P. sacchari** (WP\_035529912.1); **TcuC**, locus tag STM0689, from LT2 (WP\_000057014.1); and **MFS-D A. denitrificans** (WP\_159877498.1). TcuC of LT2 was originally designated CitA because of its ability to transport citrate. The seven amino acid replacements indicated above in TcuC (previously called CitA) enable growth on isocitrate presumably because of altered specificity of transport (14).

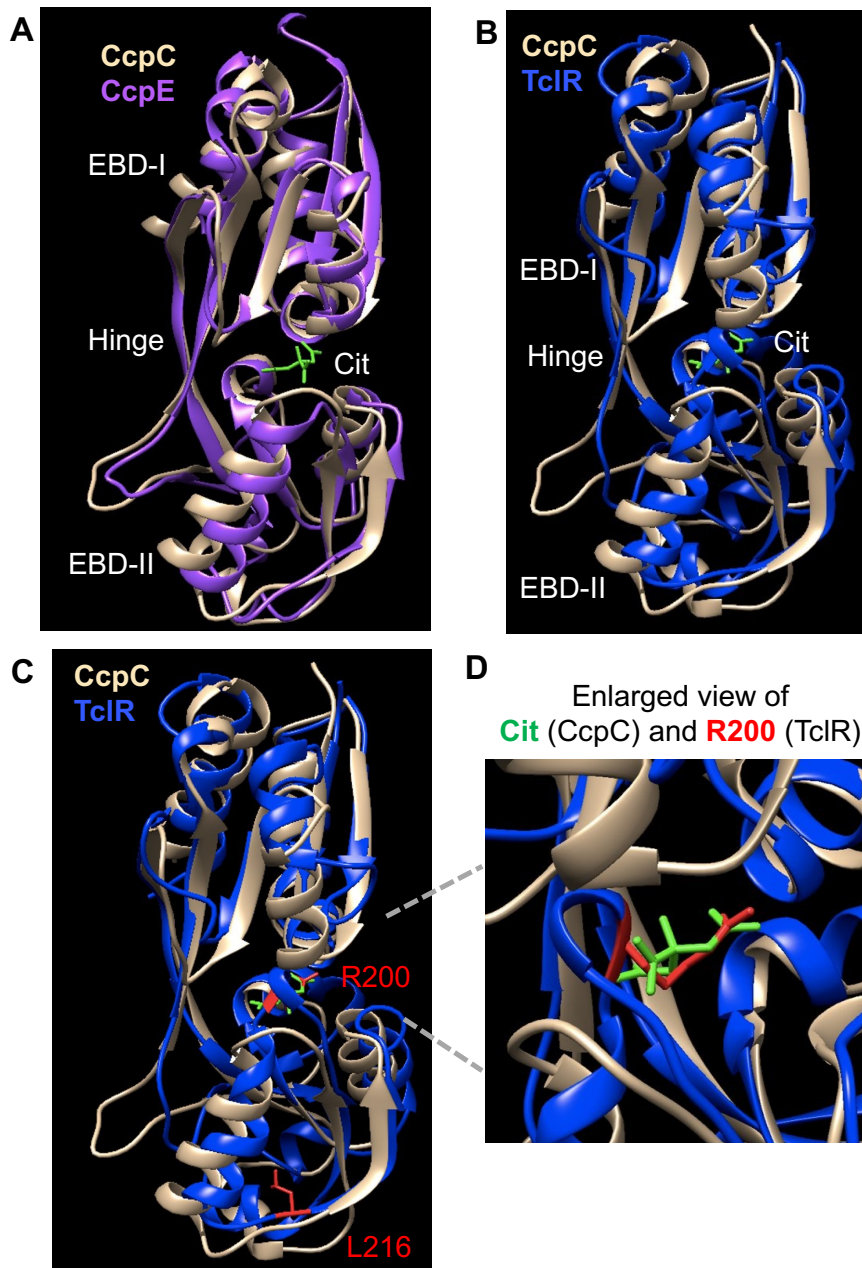

**FIG S6** Comparisons of the structures of the Effector-Binding Domains (EBDs) of two citrate (Cit)-responsive LTTRs: CcpE (15) and CcpC (16). (A) structures of CcpC-EBD (tan, PDB identifier 7DMW) and CcpE (purple, PDB identifier 4QBA) are superimposed. The effector, Cit, is in a typical effector-binding pocket between the two subdomains (EBD-I and EBD-II). When the effector binds, it brings these subdomains closer together with movement accommodated by two beta-strands that form a hinge-like connector. (B) Model of the TcIR-EBD, generated using the Phyre2 prediction software (17), aligned with the Cit-bound CcpC structure. (C) Alignment as in panel B, with two residues of TcIR highlighted in red, R200 and L216. These residues when replaced with Q and P, respectively, resulted in TcIR variants with increased responsiveness to Tcb. (D) Enlarged view of the effector binding-site of panel C showing that R200 of TcIR is predicted to reside in the same location as Cit in the CcpC structure.



**SUPPLEMENTAL MATERIAL** Baugh et al., 2023  
Regulation of tricarboxylate transport and metabolism in *Acinetobacter baylyi* ADP1

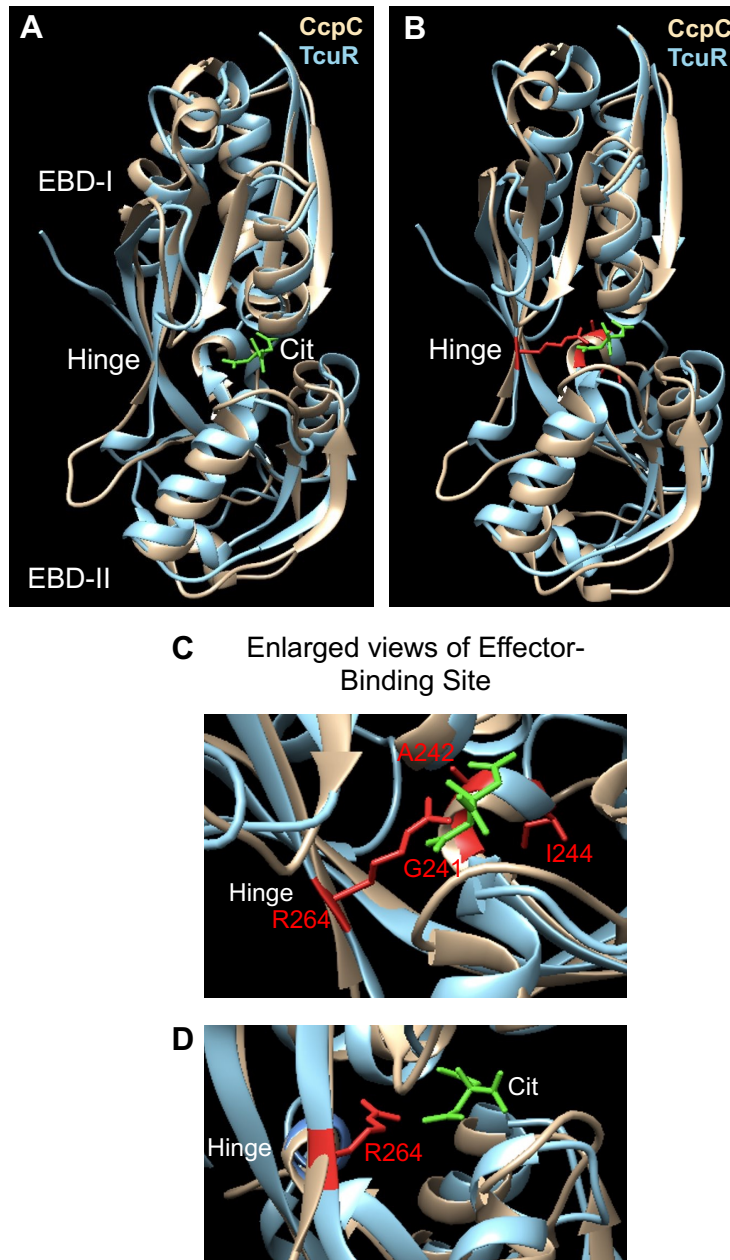

**FIG S7** Comparisons of (A) the structure of the Effector-Binding Domains (EBDs) of a citrate (Cit)-responsive LTTR, CcpC (tan, PDB identifier 7DMW) (16), and a model of the TcuR-EBD of LT2, from the AlphaFold protein structure database (identifier AF-Q8ZQX2-F1) (18, 19). (B) One residue of TcuR, R264, is highlighted in red. Its replacement by L, resulted in constitutive transcription of the *tcuABC* operon in LT2 (12). In the wild-type protein, this residue is situated in the center of one of the two beta-strands that form the hinge-like connection between the EBD subunits. Enlarged views of the effector-binding pockets in (C) and (D) show that the location of the effector in the Cit-bound CcpC structure is in the vicinity of R264 and other residues highlighted in red (G241, A242, and I244). These are positions where individual amino acid replacements resulted in constitutively active TcuR variants (12).



**SUPPLEMENTAL MATERIAL** Baugh et al., 2023  
Regulation of tricarboxylate transport and metabolism in *Acinetobacter baylyi* ADP1

**REFERENCES**

1. Stothard P. 2000. The sequence manipulation suite: JavaScript programs for analyzing and formatting protein and DNA sequences. *Biotechniques* 28:1102-1104.
2. Vanechoutte M, Young DM, Ornston LN, De Baere T, Nemeč A, Van Der Reijden T, Carr E, Tjernberg I, Dijkshoorn L. 2006. Naturally transformable *Acinetobacter* sp strain ADP1 belongs to the newly described species *Acinetobacter baylyi*. *Appl Environ Microbiol* 72:932-936. <https://doi.org/10.1128/Aem.72.1.932-936.2006>
3. Juni E, Janik A. 1969. Transformation of *Acinetobacter calco-aceticus* (*Bacterium anitratum*). *J Bacteriol* 98:281-8. <https://doi.org/10.1128/jb.98.1.281-288.1969>
4. Eraso JM, Kaplan S. 1994. *prxA*, a putative response regulator involved in oxygen regulation of photosynthesis gene expression in *Rhodobacter sphaeroides*. *J Bacteriol* 176:32-43. <https://doi.org/10.1128/jb.176.1.32-43.1994>
5. Jha RK, Bingen JM, Johnson CW, Kern TL, Khanna P, Trettel DS, Strauss CEM, Beckham GT, Dale T. 2018. A protocatechuate biosensor for *Pseudomonas putida* KT2440 via promoter and protein evolution. *Metab Eng Commun* 6:33-38. <https://doi.org/10.1016/j.meteno.2018.03.001>
6. Jones RM, Williams PA. 2003. Mutational analysis of the critical bases involved in activation of the AreR-regulated sigma54-dependent promoter in *Acinetobacter* sp. strain ADP1. *Appl Environ Microbiol* 69:5627-35. <https://doi.org/10.1128/AEM.69.9.5627-5635.2003>
7. Norrander J, Kempe T, Messing J. 1983. Construction of improved M13 vectors using oligodeoxynucleotide-directed mutagenesis. *Gene* 26:101-6. [https://doi.org/10.1016/0378-1119\(83\)90040-9](https://doi.org/10.1016/0378-1119(83)90040-9)
8. Horton RM, Cai ZL, Ho SN, Pease LR. 2013. Gene splicing by overlap extension: Tailor-made genes using the polymerase chain reaction. *BioTechniques* 54:129-133. <https://doi.org/10.2144/000114017>
9. Kostylev M, Otwell AE, Richardson RE, Suzuki Y. 2015. Cloning should be simple: *Escherichia coli* DH5 alpha-mediated assembly of multiple DNA fragments with short end homologies. *Plos One* 10. <https://doi.org/10.1371/journal.pone.0137466>
10. Takiguchi A, Yoshioka I, Oda Y, Ishii Y, Kirimura K. 2021. Constitutive production of aconitate isomerase by *Pseudomonas* sp. WU-0701 in relation to *trans*-aconitic acid assimilation. *J Biosci Bioeng* 131:47-52. <https://doi.org/10.1016/j.jbiosc.2020.09.003>
11. Yuhara K, Yonehara H, Hattori T, Kobayashi K, Kirimura K. 2015. Enzymatic characterization and gene identification of aconitate isomerase, an enzyme involved in assimilation of *trans*-aconitic acid, from *Pseudomonas* sp. WU-0701. *FEBS J* 282:4257-67. <https://doi.org/10.1111/febs.13494>
12. Lewis JA, Stamper LW, Escalante-Semerena JC. 2009. Regulation of expression of the tricarboxylate utilization operon (*tcuABC*) of *Salmonella enterica*. *Res Microbiol* 160:179-86. <https://doi.org/10.1016/j.resmic.2009.01.001>
13. Dereeper A, Guignon V, Blanc G, Audic S, Buffet S, Chevenet F, Dufayard JF, Guindon S, Lefort V, Lescot M, Claverie JM, Gascuel O. 2008. Phylogeny.fr: robust phylogenetic analysis for the non-specialist. *Nucleic Acids Res* 36:W465-9. <https://doi.org/10.1093/nar/gkn180>
14. Shimamoto T, Negishi K, Tsuda M, Tsuchiya T. 1996. Mutational analysis of the CitA citrate transporter from *Salmonella typhimurium*: altered substrate specificity. *Biochem Biophys Res Commun* 226:481-7. <https://doi.org/10.1006/bbrc.1996.1381>
15. Ding Y, Liu X, Chen F, Di H, Xu B, Zhou L, Deng X, Wu M, Yang CG, Lan L. 2014. Metabolic sensor governing bacterial virulence in *Staphylococcus aureus*. *Proc Natl Acad Sci U S A* 111:E4981-90. <https://doi.org/10.1073/pnas.1411077111>
16. Liu W, Chen J, Jin L, Liu ZY, Lu M, Jiang G, Yang Q, Quan C, Nam KH, Xu Y. 2021. Functional and structural analysis of catabolite control protein C that responds to citrate. *Sci Rep* 11:20285. <https://doi.org/10.1038/s41598-021-99552-x>
17. Kelley LA, Mezulis S, Yates CM, Wass MN, Sternberg MJ. 2015. The Phyre2 web portal for protein modeling, prediction and analysis. *Nat Protoc* 10:845-58. <https://doi.org/10.1038/nprot.2015.053>
18. Varadi M, Anyango S, Deshpande M, Nair S, Natassia C, Yordanova G, Yuan D, Stroe O, Wood G, Laydon A, Zidek A, Green T, Tunyasuvunakool K, Petersen S, Jumper J, Clancy E, Green R, Vora A, Lutfi M, Figurnov M, Cowie A, Hobbs N, Kohli P, Kleywegt G, Birney E, Hassabis D, Velankar S. 2022. AlphaFold Protein Structure Database: massively expanding the structural coverage of protein-sequence space with high-accuracy models. *Nucleic Acids Res* 50:D439-D444. <https://doi.org/10.1093/nar/gkab1061>
19. Jumper J, Evans R, Pritzel A, Green T, Figurnov M, Ronneberger O, Tunyasuvunakool K, Bates R, Zidek A, Potapenko A, Bridgland A, Meyer C, Kohl SAA, Ballard AJ, Cowie A, Romera-Paredes B, Nikolov S, Jain R,

**SUPPLEMENTAL MATERIAL** Baugh et al., 2023  
Regulation of tricarboxylate transport and metabolism in *Acinetobacter baylyi* ADP1

Adler J, Back T, Petersen S, Reiman D, Clancy E, Zielinski M, Steinegger M, Pacholska M, Berghammer T, Bodenstein S, Silver D, Vinyals O, Senior AW, Kavukcuoglu K, Kohli P, Hassabis D. 2021. Highly accurate protein structure prediction with AlphaFold. Nature 596:583-589. <https://doi.org/10.1038/s41586-021-03819-2>
